# Supplementary material for: In Vitro Metabolism of Donepezil in Liver Microsomes Using Non-Targeted Metabolomics
Source: MDPI journal article supplement (doi:10.3390/pharmaceutics13070936), 2021-06-23
Supplement: s1 [file s1]

# Supplementary Materials: In Vitro Metabolism of Donepezil in Liver Microsomes Using Non-Targeted Metabolomics

Sin-Eun Kim, Hyung-Ju Seo, Yeojin Jeong, Gyung-Min Lee, Seung-Bae Ji, So-Young Park, Zhexue Wu, Sangkyu Lee, Sunghwan Kim and Kwang-Hyeon Liu

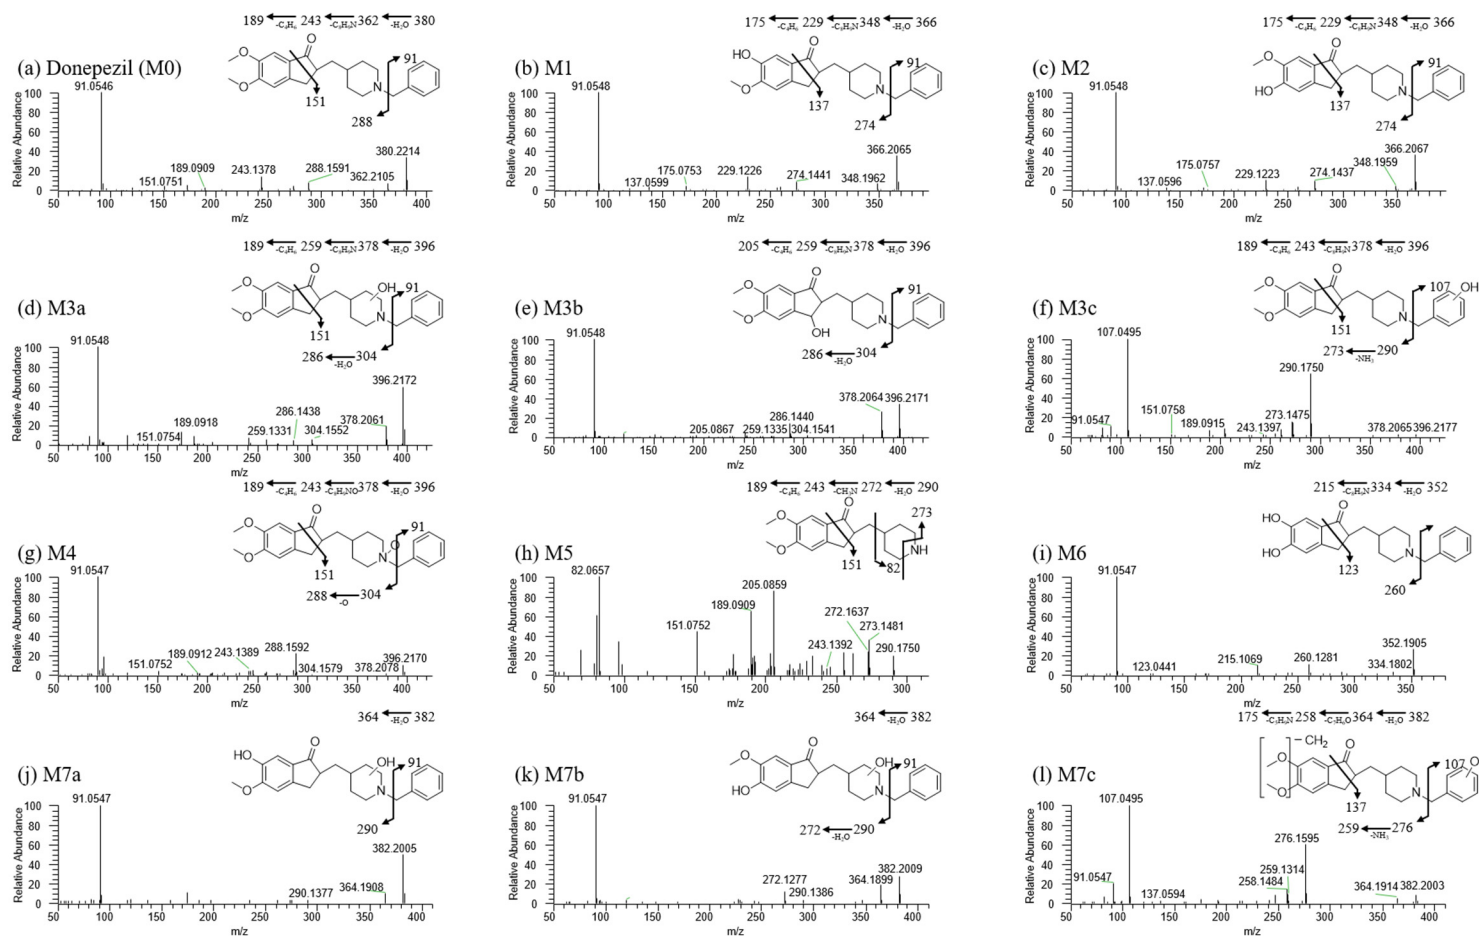

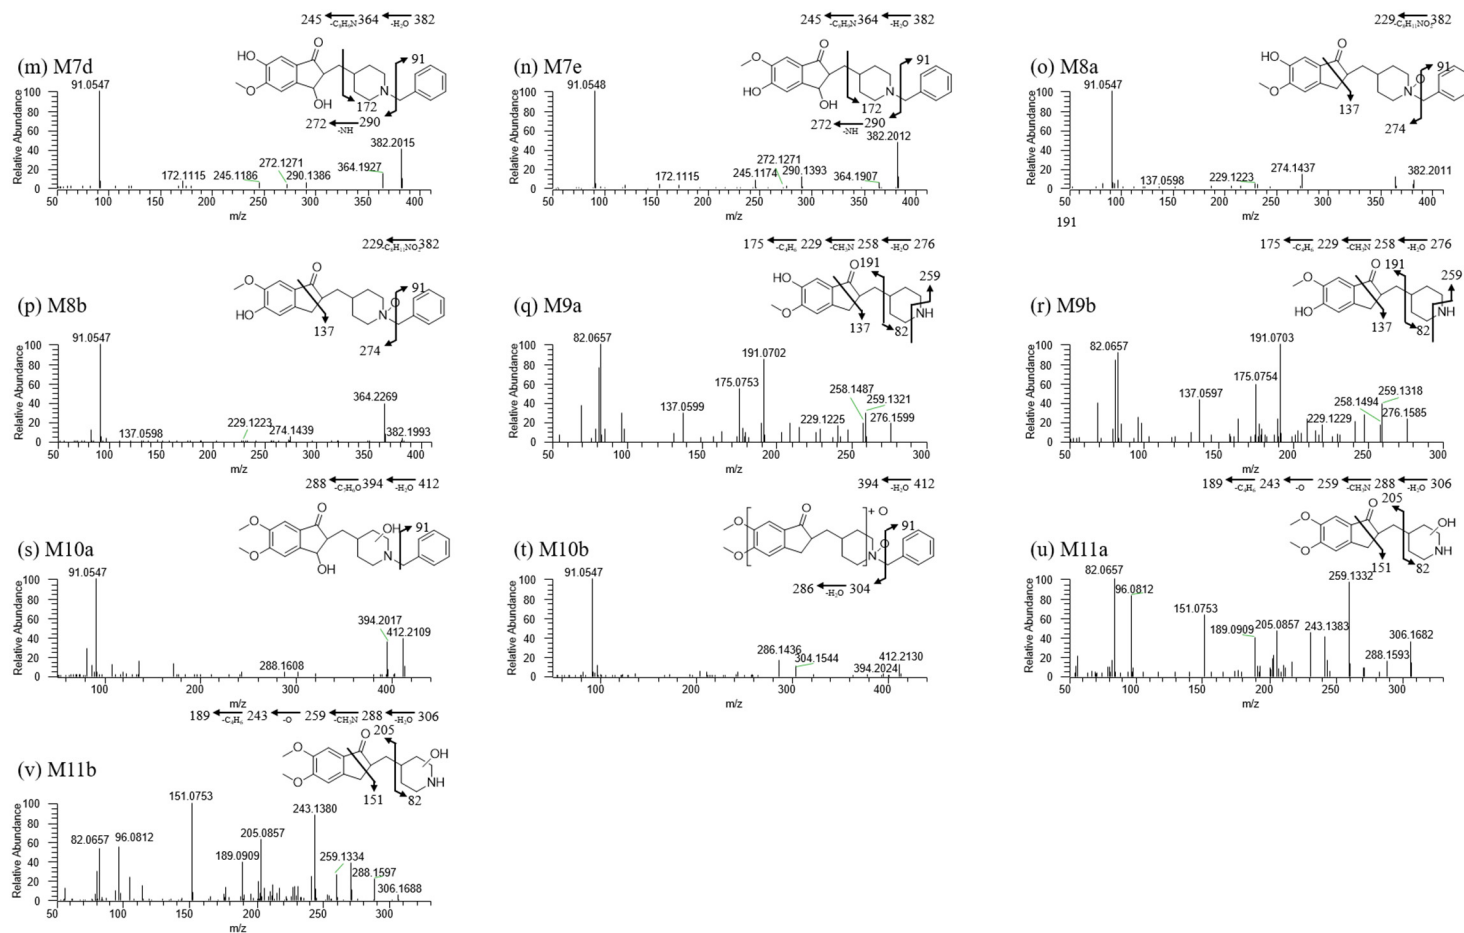

**Figure S1.** (a) Representative product ion scan mass spectra of donepezil (M0) and (b–v) metabolites of donepezil (M1–M11), and their proposed fragmentation scheme. The information on each metabolite is given in Table 1.

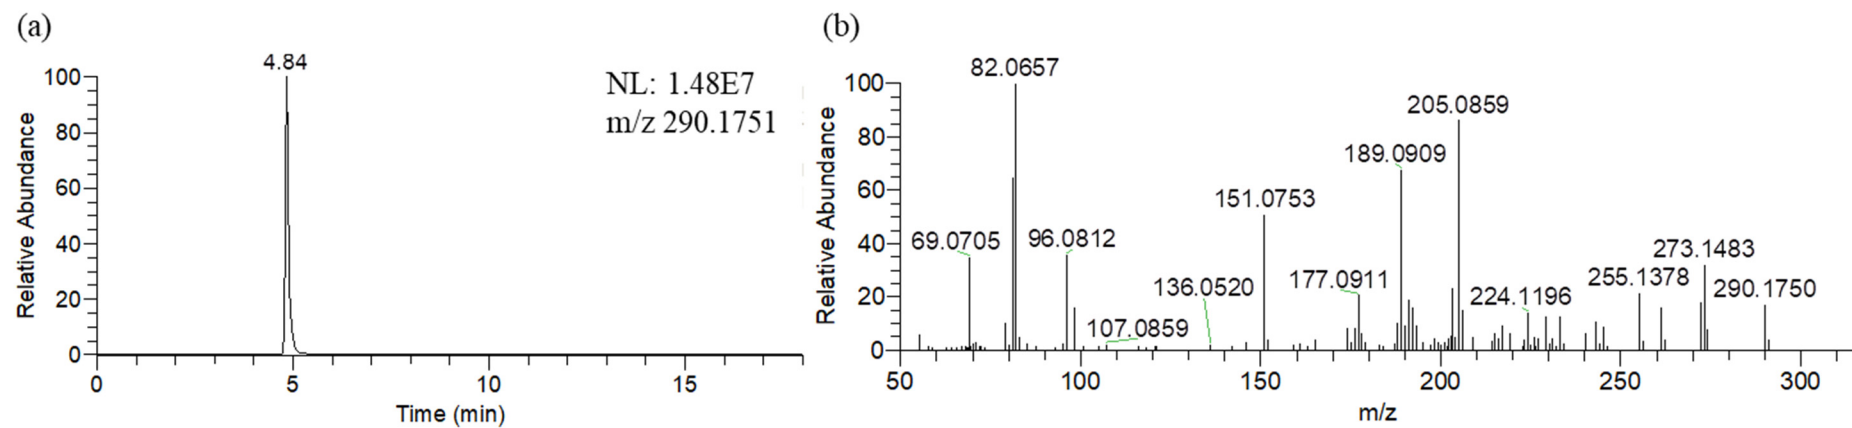

**Figure S2.** (a) Representative extracted ion chromatograms and (b) product ion scan mass spectrum of *N*-desbenzyldonepezil (**M5**) authentic standard.
